# Supplementary material
Source: PubMed Central journal article supplement (PMC3485930)
Supplement: AEM.02294-12_zam999103852so1.pdf [file AEM.02294-12_zam999103852so1.pdf]

A

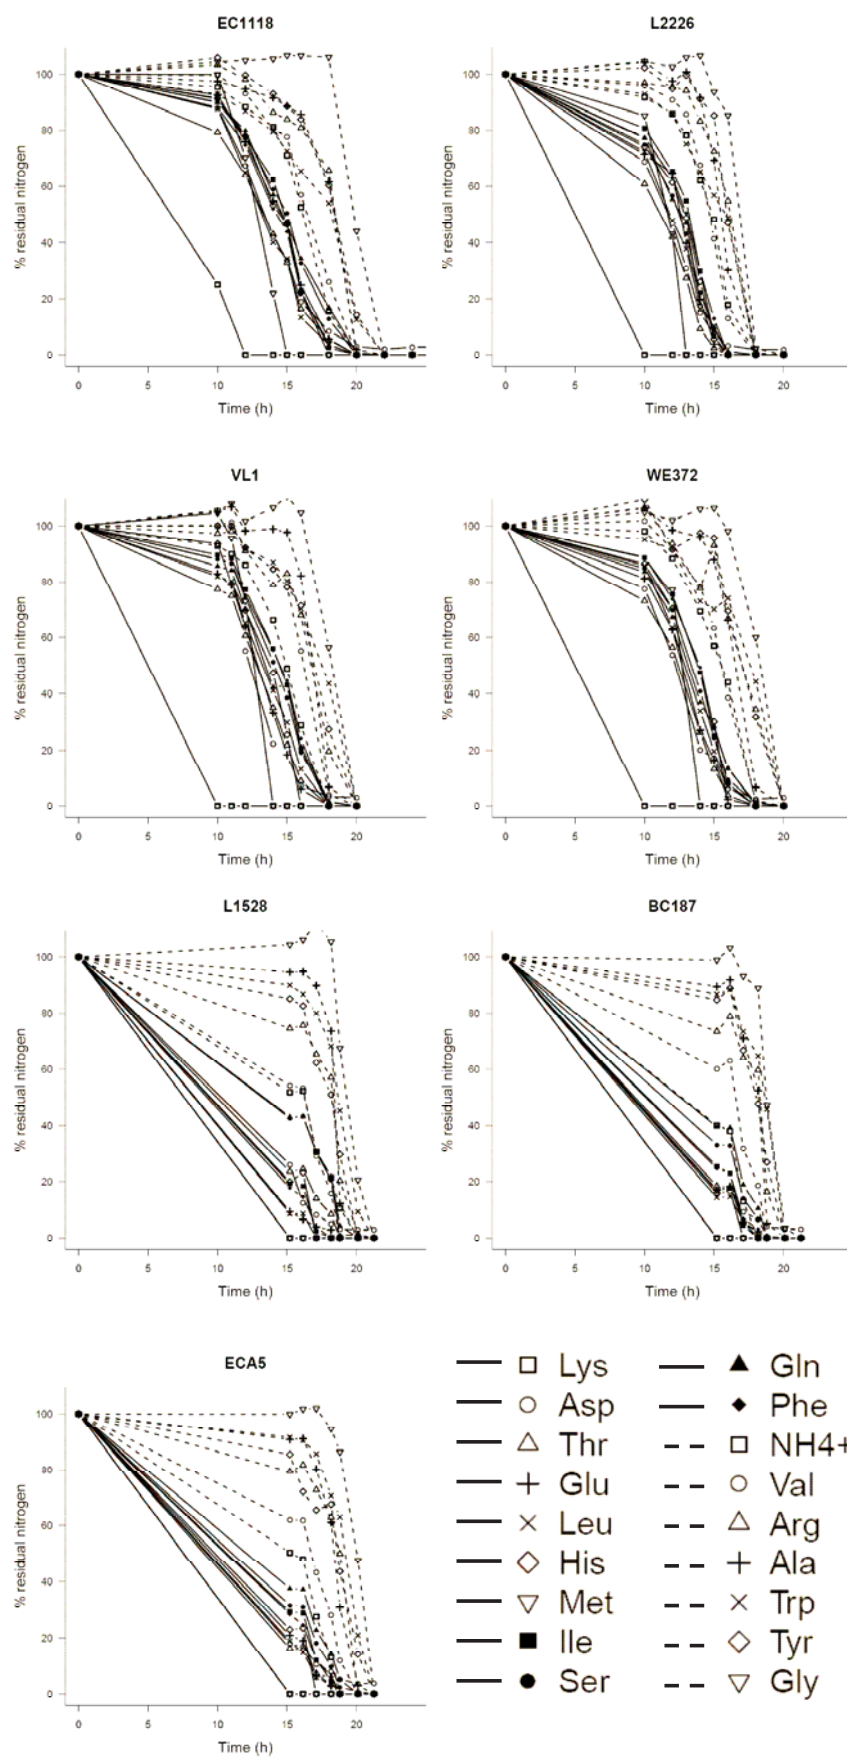

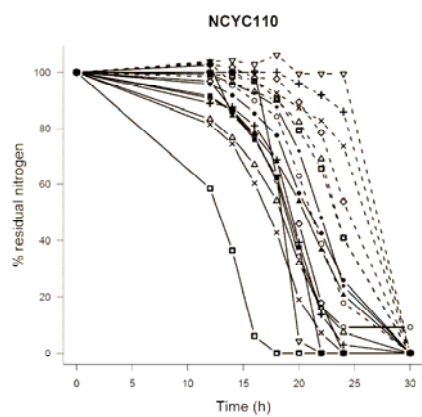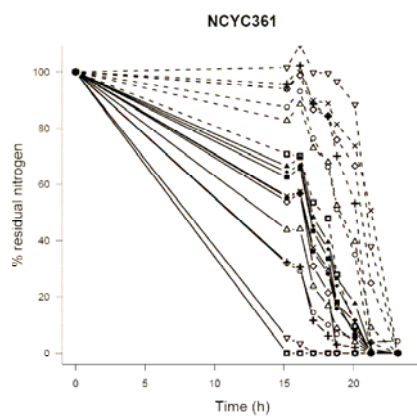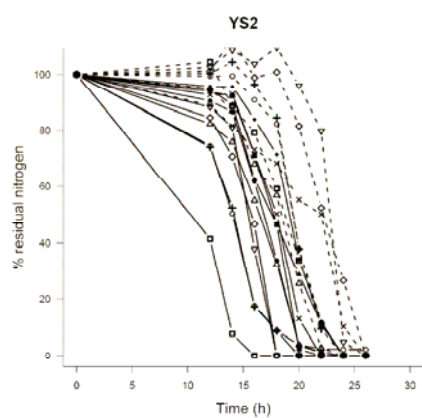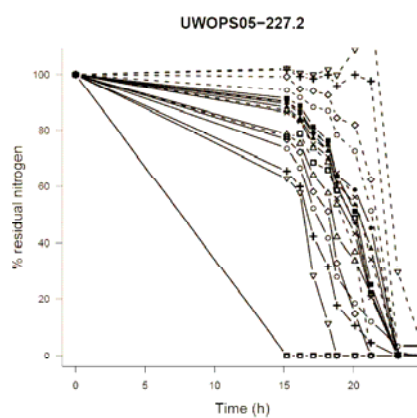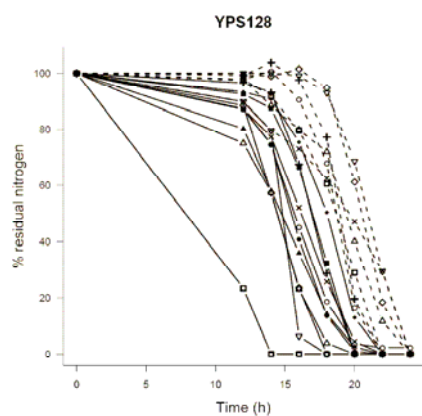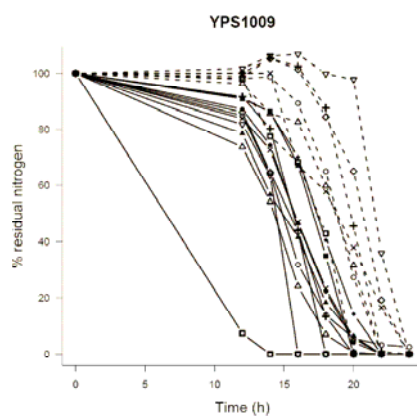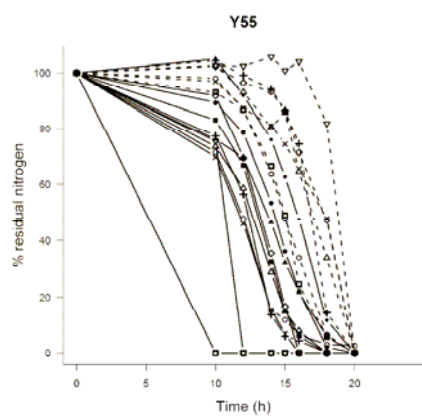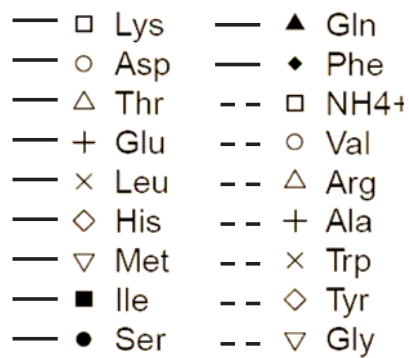

B

a

| Strains       | Rep | TLAG |     |     |     |     |     |     |     |     |     |     |     |     |     |     |
|---------------|-----|------|-----|-----|-----|-----|-----|-----|-----|-----|-----|-----|-----|-----|-----|-----|
|               |     | Lys  | Asp | Thr | Glu | Leu | His | Met | Ile | Ser | Gln | Phe | NH4 | Val | Arg | Ala |
| BC187         | 1   | Lys  | Met | Asp | Leu | Glu | Thr | His | Phe | Ser | Ile | Gln | NH4 | Val | Tyr | Arg |
| EC1118        | 1   | Lys  | Asp | Thr | Leu | Glu | Ser | Phe | His | Met | Val | Trp | Ile | NH4 | Tyr | Ala |
| EC1118        | 2   | Lys  | Gln | Thr | Leu | Asp | Ser | Phe | Ile | Met | His | Glu | NH4 | Val | Trp | Tyr |
| ECA5          | 1   | Lys  | Met | Asp | Thr | Leu | Glu | Ser | Phe | Gln | Ile | His | NH4 | Val | Tyr | Trp |
| L1528         | 1   | Lys  | Met | Asp | Glu | Leu | Thr | Phe | Ile | His | Gln | Ser | NH4 | Val | Tyr | Arg |
| L2226         | 1   | Lys  | Thr | Glu | Leu | His | Met | Ile | Phe | Asp | Ser | NH4 | Gln | Val | Trp | Tyr |
| L2226         | 2   | Lys  | Thr | Asp | Leu | Ser | Gln | Glu | Met | Phe | Ile | His | NH4 | Trp | Val | Arg |
| NCYC110       | 1   | Lys  | Asp | Thr | Leu | Ser | His | Met | Glu | Val | Ile | Phe | Gln | NH4 | Arg | Tyr |
| NCYC110       | 2   | Lys  | Gln | Leu | Thr | Trp | His | Ile | Asp | Met | Ser | NH4 | Val | Phe | Glu | Arg |
| NCYC361       | 1   | Lys  | Met | Asp | Glu | Thr | Leu | Ser | Gln | Phe | Ile | His | NH4 | Arg | Val | Tyr |
| UWOPS05-227.2 | 1   | Lys  | Met | Glu | Asp | Thr | His | NH4 | Leu | Gln | Phe | Ser | Trp | Ile | Arg | Val |
| VL1           | 1   | Lys  | Met | Asp | Glu | Thr | Leu | Ser | Phe | His | Ile | NH4 | Val | Gln | Trp | Tyr |
| VL1           | 2   | Lys  | Thr | Gln | Asp | Leu | Glu | Ser | Phe | Met | Ile | NH4 | His | Arg | Trp | Val |
| WE372         | 1   | Lys  | Met | Ile | Asp | Thr | Leu | Glu | Ser | His | Phe | NH4 | Arg | Trp | Val | Gln |
| WE372         | 2   | Lys  | Met | Thr | Gln | Asp | Leu | Glu | Ser | Phe | Ile | NH4 | Val | His | Arg | Trp |
| Y55           | 1   | Lys  | Met | Asp | Leu | Glu | Thr | Ile | His | Ser | Val | NH4 | Phe | Gln | Trp | Arg |
| Y55           | 2   | Lys  | Asp | Leu | Thr | Gln | Glu | Ile | Met | Ser | His | Val | Phe | NH4 | Arg | Tyr |
| YPS1009       | 1   | Lys  | Thr | Asp | Leu | Trp | Ser | Glu | Met | Phe | Ile | His | Arg | NH4 | Val | Tyr |
| YPS1009       | 2   | Lys  | Gln | Trp | Thr | Leu | Asp | Ser | Met | Phe | Glu | NH4 | His | Ile | Arg | Val |
| YPS128        | 1   | Lys  | Thr | Asp | Leu | Ser | Glu | His | Met | Phe | Ile | Gln | NH4 | Trp | Arg | Val |
| YPS128        | 2   | Lys  | His | Met | Trp | Gln | Thr | Leu | Asp | Ser | Ile | Arg | NH4 | Phe | Glu | Ala |
| YS2           | 1   | Lys  | Asp | Glu | Thr | Met | His | Arg | NH4 | Ser | Phe | Leu | Val | Ala | Ile | Tyr |
| YS2           | 2   | Lys  | Trp | Asp | Glu | Gln | Thr | Met | Arg | NH4 | Ser | His | Leu | Phe | Ile | Val |

b

| Strains       | Rep | T50N |     |     |     |     |     |     |     |     |     |     |     |     |     |     |
|---------------|-----|------|-----|-----|-----|-----|-----|-----|-----|-----|-----|-----|-----|-----|-----|-----|
|               |     | Lys  | Asp | Thr | Glu | Leu | His | Met | Ile | Ser | Gln | Phe | NH4 | Val | Arg | Ala |
| BC187         | 1   | Lys  | Asp | Leu | Thr | His | Met | Glu | Phe | Ile | Ser | Gln | NH4 | Val | Tyr | Arg |
| EC1118        | 1   | Lys  | Leu | Asp | Thr | Met | Glu | Phe | Ile | His | Ser | Gln | NH4 | Val | Trp | Tyr |
| EC1118        | 2   | Lys  | Met | Leu | Thr | Asp | Phe | His | Ile | Gln | Glu | Ser | NH4 | Val | Arg | Ala |
| ECA5          | 1   | Lys  | Asp | Thr | Leu | Met | Glu | Phe | His | Ile | Ser | Gln | NH4 | Val | Ala | Tyr |
| L1528         | 1   | Lys  | Phe | Thr | Ile | Met | His | Glu | Asp | Leu | Ser | Gln | NH4 | Val | Tyr | Arg |
| L2226         | 1   | Lys  | Thr | Met | Asp | Glu | Leu | Ser | His | Phe | Ile | Gln | Val | NH4 | Tyr | Ala |
| L2226         | 2   | Lys  | Thr | Asp | Met | Leu | Ser | Gln | Glu | His | Phe | Ile | Val | NH4 | Trp | Arg |
| NCYC110       | 1   | Lys  | Met | Leu | Thr | Asp | Ile | Glu | His | Gln | Ser | Val | Phe | NH4 | Arg | Tyr |
| NCYC110       | 2   | Lys  | Leu | Met | His | Ile | Asp | Gln | Thr | Glu | Ser | Val | Phe | Arg | NH4 | Trp |
| NCYC361       | 1   | Lys  | Asp | Glu | Met | Thr | His | Ser | Leu | Ile | Phe | Gln | NH4 | Val | Arg | Ala |
| UWOPS05-227.2 | 1   | Lys  | Met | Glu | Asp | His | Thr | Arg | Leu | NH4 | Phe | Ile | Gln | Trp | Ser | Val |
| VL1           | 1   | Lys  | Asp | Glu | Thr | Leu | His | Ser | Met | Phe | Ile | Gln | NH4 | Val | Tyr | Ala |
| VL1           | 2   | Lys  | Asp | Met | Thr | Glu | Leu | His | Gln | Ser | Ile | Phe | NH4 | Val | Arg | Ala |
| WE372         | 1   | Lys  | Asp | Glu | Thr | Leu | Ser | His | Phe | Gln | Ile | Val | NH4 | Ala | Tyr | Arg |
| WE372         | 2   | Lys  | Asp | Thr | His | Glu | Leu | Gln | Ser | Ile | Phe | NH4 | Val | Ala | Arg | Tyr |
| Y55           | 1   | Lys  | Asp | Leu | Glu | Thr | Ile | His | Gln | Ser | Val | NH4 | Phe | Ala | Arg | Tyr |
| Y55           | 2   | Lys  | Met | Leu | Asp | Glu | Thr | Ile | His | Gln | Ser | NH4 | Val | Phe | Ala | Arg |
| YPS1009       | 1   | Lys  | Thr | Met | Glu | Asp | His | Leu | Ser | Gln | Ile | Phe | NH4 | Val | Arg | Trp |
| YPS1009       | 2   | Lys  | Thr | Met | Asp | Gln | His | Glu | Leu | Ser | Ile | NH4 | Phe | Trp | Arg | Val |
| YPS128        | 1   | Lys  | Thr | Met | Asp | Ser | Gln | His | Leu | Glu | Ile | Phe | NH4 | Val | Trp | Ala |
| YPS128        | 2   | Lys  | Thr | His | Gln | Met | Ser | Asp | Leu | Glu | Ile | Phe | NH4 | Val | Ala | Arg |
| YS2           | 1   | Lys  | Glu | Asp | Met | His | Thr | Ser | Ile | Leu | Gln | Arg | Phe | NH4 | Ala | Val |
| YS2           | 2   | Lys  | Asp | Glu | Met | His | Thr | Ser | Ile | Gln | Leu | Arg | NH4 | Phe | Ala | Val |

**Supplemental material S1:** Consumption of ammonium and amino acids by 14 *S. cerevisiae* strains during fermentation in SM200.

**A.** Consumption profiles. Residual concentrations of (□) Lys, (○) Asp, (Δ) Thr, (+) Glu, (x) Leu, (□) His, (Ñ) Met, (□) Ile, (●) Ser, (▲) Gln, (□) Phe, solid lines, and (□) NH<sub>4</sub><sup>+</sup>, (○) Val, (Δ) Arg, (+) Ala, (x) Trp, (□) Tyr and (Ñ) Gly, dashed lines. Residual concentrations are expressed as percentages of the initial concentration. One representative experiment of two is shown.

**B.** Classification of nitrogen sources (indicated by a colored box) according to (a) TLAG and (b) T50N. The number of replicates (Rep) is indicated.
